# Supplementary material for: CRISPR-based Activation of Endogenous Neurotrophic Genes in Adipose Stem Cell Sheets to Stimulate Peripheral Nerve Regeneration
Source: PubMed Central journal article supplement (PMC6735509; doi:10.7150/thno.36790), 2019-08-14
Supplement: thnov09p6099s1.pdf [file thnov09p6099s1.pdf]

**Table. S1.** Spacer sequences were designed with highest computed efficacy and specificity score by [crispr-era.stanford.edu/](http://crispr-era.stanford.edu/), the window of -700 to -50 relative to transcription start site (TSS) was selected for construction of sgRNA.

| <b>Target gene</b> | <b>Distance to TSS</b> | <b>Spacer sequence (5'→3')</b> |
|--------------------|------------------------|--------------------------------|
| <i>Bdnf</i>        | -75                    | GAATTCTATTAGGCAAACCTC          |
| <i>Bdnf</i>        | -138                   | GGGGAATTAGGGATACCCCA           |
| <i>Bdnf</i>        | -208                   | GTGCGTGAGTTCGCTAGGAC           |
| <i>Gdnf</i>        | -113                   | GGAGCAAGAGCACGCAATCC           |
| <i>Gdnf</i>        | -225                   | GAGGCCGGTGTGCGAGGTGT           |
| <i>Gdnf</i>        | -466                   | GACACCACGTCAAACCGCGC           |
| <i>Ngf</i>         | -155                   | GTCACAGCAGGTGCCCGGCT           |
| <i>Ngf</i>         | -186                   | GTCCCAGGACCCCTACAACC           |
| <i>Ngf</i>         | -691                   | GCAGTCCCAAGCCTTAAGAC           |

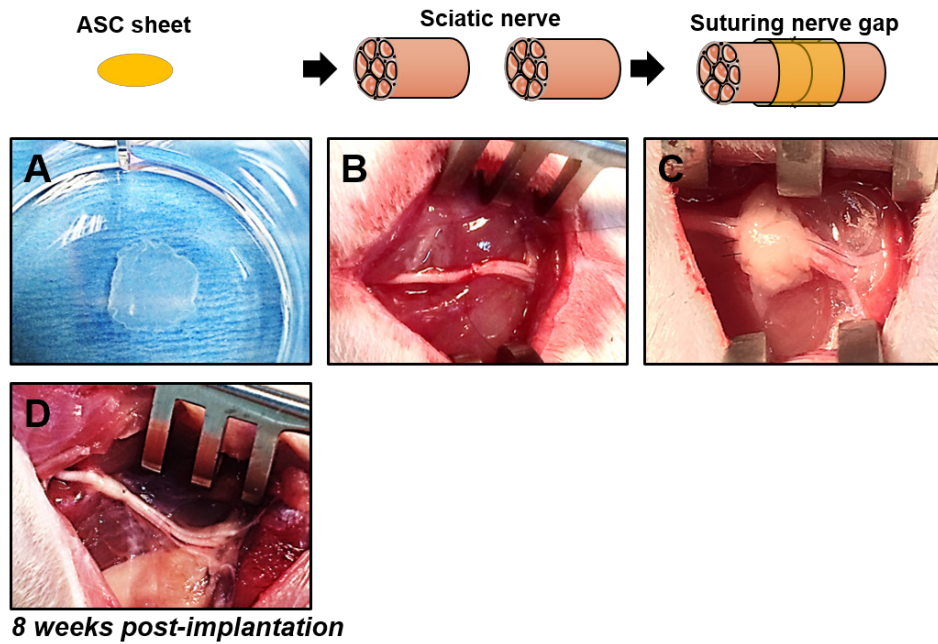

**Fig. S1.** (A) CRISPRa engineered/mock transduced ASC sheets were prepared and harvested before the animal experiment. (B) The rat sciatic nerve was transected and (C) performed a direct sutured and wrapped with two ASC sheets. (D) The morphology of regenerated sciatic nerve at 8 weeks after implantation.
